# Supplementary material
Source: PubMed Central journal article supplement (PMC4420905)
Supplement: JB.02625-14_zjb999093623so1.pdf [file JB.02625-14_zjb999093623so1.pdf]

1 **Supplemental Information**

2 **Table S1.** Primers, plasmids and strains used in experiments

| Primers                | Sequence                                                                                                                                                                                                                 |             |           |
|------------------------|--------------------------------------------------------------------------------------------------------------------------------------------------------------------------------------------------------------------------|-------------|-----------|
| <i>BsyrvO</i> -NcoI5   | 5'-GCGACCATGGAACGGATTTATTTAG-3'                                                                                                                                                                                          |             |           |
| <i>BsyrvO</i> '-BamHI3 | 5'-GGATCCGGTCACTCTCTTCGCCG-3'                                                                                                                                                                                            |             |           |
| <i>BsmnmA</i> -NdeI5   | 5'-GACCATATGGAAAACGGCCGGAGG-3'                                                                                                                                                                                           |             |           |
| <i>BsmnmA</i> -BamHI3  | 5'-GCTGGATCCTTTTATACGTACCACAATTTTGTTCGG-3'                                                                                                                                                                               |             |           |
| Plasmids               | Relevant Gene Cloned                                                                                                                                                                                                     | Vector      | Reference |
| pDS 16                 | <i>yrvO</i> PCR product using <i>BsyrvO</i> -NcoI5 and <i>BsyrvO</i> -BamHI3 primers. It places NcoI and BamHI sites at 5' and 3' sites flanking <i>yrvO</i> coding sequence                                             | pCR2.1 TOPO | This work |
| pDS 22                 | 1.1 kb NcoI-BamHI <i>yrvO</i> fragment ligated into NcoI-BglII sites of pAra13.                                                                                                                                          | pAra13      | This work |
| pDS 31                 | 827bp BamHI-BglII fragment of pDS16 containing ' <i>yrvO</i> was cloned into BamHI of pMutin4.                                                                                                                           | pMutin4     | This work |
| pDS 123                | <i>mnmA</i> PCR product using <i>BsmnmA</i> -NdeI5 and <i>BsmnmA</i> -BamHI3 primers. It places NdeI and BamHI sites at 5' and 3' sites flanking <i>mnmA</i> coding sequence                                             | pCR2.1 TOPO | This work |
| pDS143                 | 1.2 kb NdeI-BamHI fragment of <i>mnmA</i> ligated into NdeI-BamHI sites of pET16b                                                                                                                                        | pet16b      | This work |
| pDS 144                | <i>yrvO</i> - <i>mnmA</i> PCR product using <i>BsyrvO</i> -NcoI5 and <i>BsmnmA</i> -BamHI3 primers. It places NcoI and BamHI sites at 5' and 3' sites flanking <i>yrvO</i> and <i>mnmA</i> coding sequences respectively | pCR2.1 TOPO | This work |
| pDS 145                | 2.3 kb NcoI-BamHI fragment of <i>yrvO</i> - <i>mnmA</i> ligated into NcoI-BglII sites of pBad                                                                                                                            | pBad        | This work |
| pDS151                 | 1.2 kb NcoI-BamHI fragment of <i>mnmA</i> ligated into NcoI-BglII sites of pBad                                                                                                                                          | pBad        | This work |
| pDS 173                | pDS 151 containing codon substitution at position 104 of <i>mnmA</i> (C104A, TGC to GCC)                                                                                                                                 | pBad        | This work |
| pDS 174                | pDS 143 containing codon substitution at position 104 of <i>mnmA</i> (C104A, TGC to GCC)                                                                                                                                 | pet16b      | This work |
| pDS 175                | pDS 145 containing codon substitution at position 104 of <i>mnmA</i> (C104A, TGC to GCC)                                                                                                                                 | pBad        | This work |
| pDS 178                | pDS 143 containing codon substitution at position 200 of <i>mnmA</i> (C200A, TGC to GCC)                                                                                                                                 | pet16b      | This work |
| pDS 179                | pDS 145 containing codon substitution at position 200 of <i>mnmA</i> (C200A, TGC to GCC)                                                                                                                                 | pBad        | This work |

|         |                                                                                          |        |           |
|---------|------------------------------------------------------------------------------------------|--------|-----------|
| pDS 180 | pDS 151 containing codon substitution at position 200 of <i>mnmA</i> (C200A, TGC to GCC) | pBad   | This work |
| pDS 194 | pDS 143 containing codon substitution at position 51 of <i>mnmA</i> (C51A, TGC to GCC)   | pet16b | This work |
| pDS 195 | pDS 151 containing codon substitution at position 51 of <i>mnmA</i> (C51A, TGC to GCC)   | pBad   | This work |
| pDS 196 | pDS 143 containing codon substitution at position 66 of <i>mnmA</i> (C66A, TGC to GCC)   | pet16b | This work |
| pDS 197 | pDS 151 containing codon substitution at position 66 of <i>mnmA</i> (C66A, TGC to GCC)   | pBad   | This work |
| pDS 198 | pDS 143 containing codon substitution at position 304 of <i>mnmA</i> (C304A, TGC to GCC) | pet16b | This work |
| pDS 199 | pDS 151 containing codon substitution at position 304 of <i>mnmA</i> (C304A, TGC to GCC) | pBad   | This work |
| pDS 201 | pDS 143 containing codon substitution at position 325 of <i>mnmA</i> (C325A, TGC to GCC) | pet16b | This work |
| pDS 202 | pDS 145 containing codon substitution at position 325 of <i>mnmA</i> (C325A, TGC to GCC) | pBad   | This work |
| pDS 203 | pDS 151 containing codon substitution at position 325 of <i>mnmA</i> (C325A, TGC to GCC) | pBad   | This work |
| pDS 217 | pDS 145 containing codon substitution at position 304 of <i>mnmA</i> (C304A, TGC to GCC) | pBad   | This work |
| pDS 219 | pDS 22 containing codon substitution at position 325 of <i>yrvO</i> (C325A, TGC to GCC)  | pAra13 | This work |
| pDS 220 | pDS 145 containing codon substitution at position 325 of <i>yrvO</i> (C325A, TGC to GCC) | pBad   | This work |
| pDS 221 | pDS 145 containing codon substitution at position 51 of <i>mnmA</i> (C51A, TGC to GCC)   | pBad   | This work |
| pDS 222 | pDS 145 containing codon substitution at position 66 of <i>mnmA</i> (C66A, TGC to GCC)   | pBad   | This work |

| Strain                   | Relevant Genotype                                                                                 | Reference                    |
|--------------------------|---------------------------------------------------------------------------------------------------|------------------------------|
| <i>B. subtilis</i> PS832 | wild type strain                                                                                  | Corfe et al 1994             |
| <i>B. subtilis</i> DD19  | ' <i>yrvO</i> ::pMutin4                                                                           | This work                    |
| <i>B. subtilis</i> J1235 | <i>yqhL</i> :: <i>spc ytwF</i> :: <i>erm yrkF</i> :: <i>erm</i> :: <i>cat ybfQΔ</i> :: <i>kan</i> | T.J. Larson laboratory stock |
| <i>E. coli</i> MG1655    | wild type strain                                                                                  | Laboratory stock             |
| <i>E. coli</i> BW25113   | wild type strain                                                                                  | Laboratory stock             |
| <i>E. coli</i> CL100     | $\Delta$ <i>iscS</i>                                                                              | Lauhon and Kambampati, 2000  |
| <i>E. coli</i> JW1119    | $\Delta$ <i>mnmA</i>                                                                              | Laboratory stock             |

3

4

5

6 **Table SII Gram-positive species containing *mnmA* and cysteine desulfurase genes**

**Gram-positive species containing *mnmA* and cysteine desulfurase within same genomic neighborhood**

| <b>Species Name</b>                                        | <b>MnmA Locus Tag</b> | <b>Cysteine Desulfurase Locus Tag</b> |
|------------------------------------------------------------|-----------------------|---------------------------------------|
| <i>Acidothermus cellulolyticus</i> 11B                     | Acel_0689             | Acel_0688                             |
| <i>Actinomyces odontolyticus</i> ATCC 17982                | ACTODO_01767          | ACTODO_01768                          |
| <i>Anaerostipes caccae</i> DSM 14662                       | ANACAC_00390          | ANACAC_00392                          |
| <i>Anoxybacillus flavithermus</i> WK1                      | Aflv_0738             | Aflv_0737                             |
| <i>Arthrobacter aurescens</i> TC1                          | AAur_2710             | AAur_2712                             |
| <i>Bacillus amyloliquefaciens plantarum</i> FZB42          | RBAM_024610           | RBAM_024620                           |
| <i>Bacillus anthracis</i> Sterne                           | BAS4291               | BAS4292                               |
| <i>Bacillus cereus</i> E33L (ZK)                           | BCZK4139              | BCZK4140                              |
| <i>Bacillus halodurans</i> C-125                           | BH1261                | BH1260                                |
| <i>Bacillus licheniformis</i> DSM 13 Goettingen            | BLi02875              | BLi02876                              |
| <i>Bacillus subtilis subtilis</i> 168                      | BSU27500              | BSU27510                              |
| <i>Bacillus weihenstephanensis</i> KBAB4                   | BcerKBAB4_4243        | BcerKBAB4_4244                        |
| <i>Brevibacterium linens</i> BL2                           | BlinB01001207         | BlinB01001208                         |
| <i>Caldicellulosiruptor saccharolyticus</i> DSM 8903       | Csac_2252             | Csac_2254                             |
| <i>Carboxydotherrnus hydrogeniformans</i> Z-2901, DSM 6008 | CHY_2197              | CHY_2199                              |
| <i>Clavibacter michiganensis michiganensis</i> NCPPB 382   | CMM_1403              | CMM_1402                              |
| <i>Clostridium beijerinckii</i> NCIMB 8052                 | Cbei_1100             | Cbei_1098                             |
| <i>Clostridium botulinum</i> BoNT/A1 Hall                  | CLC_1228              | CLC_1225                              |
| <i>Clostridium cellulolyticum</i> H10                      | Ccel_1930             | Ccel_1932                             |
| <i>Clostridium difficile</i> 630 (epidemic type X)         | CD1281                | CD1279                                |
| <i>Clostridium perfringens</i> ATCC 13124                  | CPF_2037              | CPF_2039                              |
| <i>Collinsella aerofaciens</i> ATCC 25986                  | COLAER_01430          | COLAER_01431                          |
| <i>Corynebacterium diphtheriae</i> bv. Gravis              | DIP1074               | DIP1072                               |
| <i>Corynebacterium glutamicum</i> R                        | cgR_1317              | cgR_1309                              |
| <i>Deinococcus geothermalis</i> DSM 11300                  | Dgeo_0792             | Dgeo_0781                             |
| <i>Desulfotomaculum reducens</i> MI-1                      | Dred_0766             | Dred_0764                             |
| <i>Dorea longicatena</i> DSM 13814                         | DORLON_02440          | DORLON_02442                          |
| <i>Enterococcus faecalis</i> V583                          | EF2070                | EF2072                                |
| <i>Eubacterium siraeum</i> DSM 15702                       | EUBSIR_02454          | EUBSIR_02456                          |
| <i>Exiguobacterium sibiricum</i> 255-15, DSM 17290         | Exig_2078             | Exig_2079                             |
| <i>Fingoldia magna</i> ATCC 29328                          | FMG_1586              | FMG_1587                              |
| <i>Frankia alni</i> ACN14a                                 | FRAAL5861             | FRAAL5862                             |
| <i>Geobacillus kaustophilus</i> HTA426                     | GK2563                | GK2564                                |
| <i>Heliobacterium modesticaldum</i> Ice1                   | HM1_1866              | HM1_1864                              |
| <i>Janibacter</i> sp. HTCC2649                             | JNB_19083             | JNB_19078                             |
| <i>Kineococcus radiotolerans</i> SRS30216                  | Krad_1308             | Krad_1307                             |
| <i>Lactobacillus brevis</i> ATCC 367                       | LVIS_1434             | LVIS_1434                             |
| <i>Lactobacillus casei</i> ATCC 334                        | LSEI_1292             | LSEI_1289                             |
| <i>Lactobacillus johnsonii</i> NCC 533                     | LJ0986                | LJ0984                                |
| <i>Leifsonia xyli xyli</i> CTCB07                          | Lxx14390              | Lxx14420                              |

|                                                            |                |                |
|------------------------------------------------------------|----------------|----------------|
| <i>Listeria monocytogenes</i> sv. 1/2a EGD-e               | lmo1512        | lmo1513        |
| <i>Listeria welshimeri</i> sv. 6b, SLCC5334                | lwe1525        | lwe1526        |
| <i>Mycobacterium abscessus</i> CIP 104536                  | MAB_3356c      | MAB_3357c      |
| <i>Mycobacterium bovis</i> AF2122/97                       | Mb3050c        | Mb3051c        |
| <i>Mycobacterium leprae</i> TN                             | ML1707         | ML1708         |
| <i>Mycobacterium smegmatis</i> MC2 155                     | MSMEG_2358     | MSMEG_2357     |
| <i>Mycobacterium tuberculosis</i> H37Ra                    | MRA_3055       | MRA_3056       |
| <i>Nocardia farcinica</i> IFM 10152                        | nfa42670       | nfa42680       |
| <i>Nocardioides</i> sp. JS614                              | Noca_3445      | Noca_3446      |
| <i>Pediococcus pentosaceus</i> ATCC 25745                  | PEPE_1172      | PEPE_1174      |
| <i>Pelotomaculum thermopropionicum</i> SI                  | PTH_1056       | PTH_1054       |
| <i>Propionibacterium acnes</i> KPA171202                   | PPA1117        | PPA1116        |
| <i>Renibacterium salmoninarum</i> ATCC 33209               | RSal33209_1673 | RSal33209_1674 |
| <i>Rhodococcus jostii</i> RHA1                             | RHA1_ro06467   | RHA1_ro06466   |
| <i>Rubrobacter xylanophilus</i> DSM 9941                   | Rxyl_1354      | Rxyl_1353      |
| <i>Ruminococcus gnavus</i> ATCC 29149                      | RUMGNA_01754   | RUMGNA_01752   |
| <i>Salinispora arenicola</i> CNS-205                       | Sare_1107      | Sare_1106      |
| <i>Staphylococcus aureus</i> RF122                         | SAB1492c       | SAB1493c       |
| <i>Staphylococcus epidermidis</i> ATCC 12228               | SE1304         | SE1305         |
| <i>Streptococcus pneumoniae</i> sv. 14 CGSP14              | SPCG_0121      | SPCG_1185      |
| <i>Streptomyces avermitilis</i> MA-4680                    | SAV2753        | SAV2756        |
| <i>Thermoanaerobacter pseudethanolicus</i> 39E, ATCC 33223 | Teth39_0281    | Teth39_0280    |
| <i>Thermobifida fusca</i> YX                               | Tfu_0597       | Tfu_0595       |
| <i>Tropheryma whipplei</i> TW08/27                         | TW353          | TW352          |
| <i>marine actinobacterium</i> PHSC20C1                     | A20C1_05071    | A20C1_05076    |

**Gram-positive species containing *mnmA* and cysteine desulfurase genes at two separate locations in the genome**

| Species Name                                       | MnmA Locus Tag     | Cysteine Desulfurase Locus Tag |
|----------------------------------------------------|--------------------|--------------------------------|
| <i>Acholeplasma laidlawii</i> PG-8A                | ACL_0559           | ACL_1215                       |
| <i>Alkaliphilus oremlandii</i> OhILAs              | Clos_0891          | Clos_1670                      |
| <i>Anaerofustis stercorihominis</i> DSM 17244      | ANASTE_01135       | ANASTE_02089                   |
| <i>Candidatus Desulforudis audaxviator</i> MP104C  | Daud_2035          | Daud_0907                      |
| <i>Candidatus Phytoplasma onion yellows</i> OY-M   | PAM125             | PAM468                         |
| <i>Deinococcus radiodurans</i> ATCC BAA-816        | DR1759             | DR0215                         |
| <i>Eubacterium dolichum</i> DSM 3991               | EUBDOL_01338       | EUBDOL_01200                   |
| <i>Lactobacillus acidophilus</i> NCFM              | LBA0822            | LBA1177                        |
| <i>Lactococcus lactis cremoris</i> MG1363          | llmg_1725          | llmg_2048                      |
| <i>Mesoplasma florum</i> L1                        | Mfl412             | Mfl248                         |
| <i>Paenibacillus larvae larvae</i> BRL-230010      | PlarI_010100015834 | PlarI_010100022313             |
| <i>Streptococcus agalactiae</i> sv. V/V 2603V/R    | SAG2144            | SAG1098                        |
| <i>Streptococcus pyogenes</i> sv. M1 GAS SF370     | SPy2188            | SPy1122                        |
| <i>Streptococcus thermophilus</i> LMD-9            | STER_1979          | STER_1426                      |
| <i>Syntrophomonas wolfei</i> Goettingen, DSM 2245B | Swol_0464          | Swol_1912                      |

8

**Table SIII.** pmol of s<sup>2</sup>U formed in *in vitro* s<sup>2</sup>U reactions

| Reaction Components    | pmol of s <sup>2</sup> U* |              |
|------------------------|---------------------------|--------------|
|                        | - DTT                     | + DTT        |
| Cysteine               | 0.2 (±0.2)                | 0.1 (±0.03)  |
| Cysteine + YrvO + MnmA | 26.0 (±0.76)              | 43.1 (±1.75) |
| Sulfide + MnmA         | 22.5 (±1.31)              | 19.9 (±2.3)  |

9

\*Standard deviations were obtained from at least three independent experiments

10

11

MnmA<sub>His</sub> PS832\* DD19\* DD19\*  
(WT) (- IPTG) (+ IPTG)

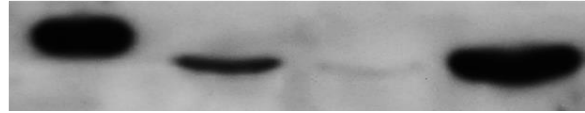

12

13 **Figure S1:** MnmA expression levels in protein crude extracts (40 ug aliquots) visualized  
14 by western analysis using an antibody against *B. subtilis* MnmA. **A.** MnmA expression  
15 in *B. subtilis* PS832 wild type strain and in the *mnmA* conditional knockout DD19 strain,  
16 in absence of the IPTG inducer (-IPTG), or in the presence of 1 mM IPTG (+IPTG).  
17 Overexposure of the same western blot displayed in **Figure 2A** allowed detection of  
18 trace amounts of MnmA expression in the *mnmA* conditional knockout DD19 strain, in  
19 absence of the IPTG inducer (-IPTG).

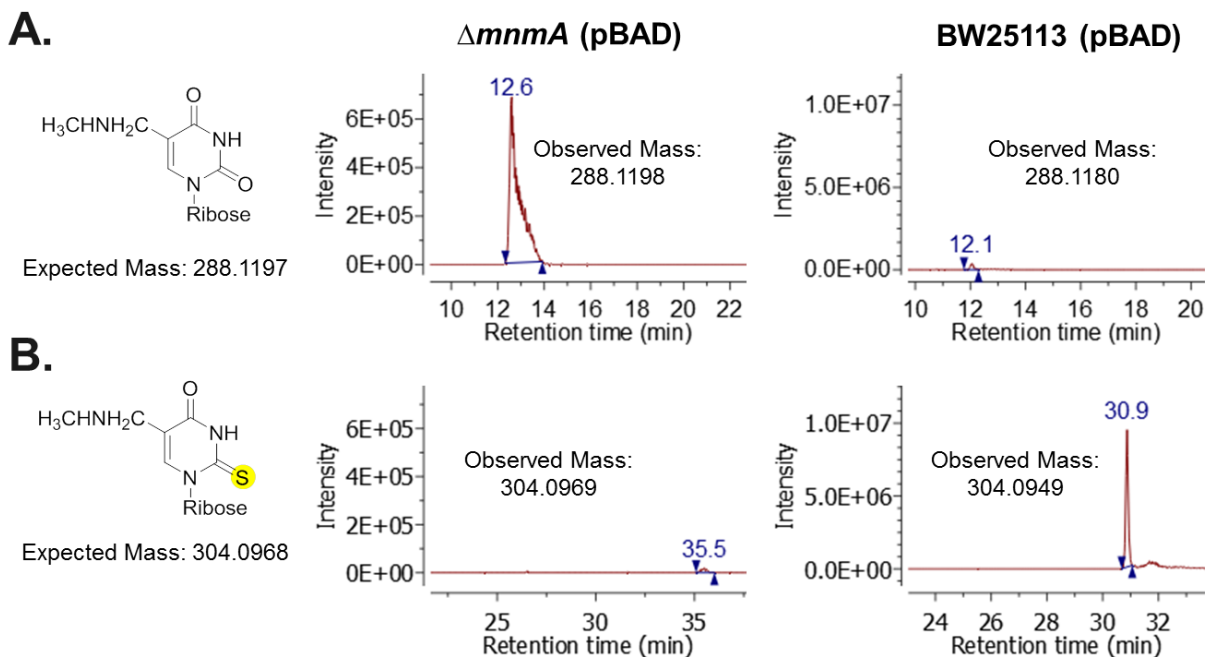

20  
21  
22  
23  
24  
25  
26

**Figure S2:** LC/MS analysis for quantification of thionucleoside levels in *E. coli* BW25113 wild type and  $\Delta mnmA$  strains expressing the empty pBAD expression vector. The Extracted Ion Chromatograms of the masses associated with **A.**  $mnm^5U$  ( $m/z$  288.1197) and **B.**  $mnm^5s^2U$  ( $m/z$  304.0968) are depicted.

```

S.e. IscS 1 MKLPIYLDYSATTPVDPRAEKMMQFLTLDGTFGNPASRSRHFVGFQAEHA
E.c. IscS 1 MKLPIYLDYSATTPVDPRAEKMMQFMTMDGTFGNPASRSRHFVGFQAEHA
A.v. IscS 1 MKLPIYLDYSATTPVDPRAQKMCCECLTMEGNFGNPASRSRHFVGFQAEHA
S.a. IscS 1 ME--IYADYAAATTPVKPEVVDAMMIYN--SHYGNPSS--THAKGRDAFKY
B.s. YrvO 1 MER-IYLDHAATSPMDERVLEQMIIPHFS--GSFGNPSS--IHSFGRESFKW
M.t. IscS 1 ---MAYLDHAATTPMHPAAIEAMA AVQR---TIGNASS--LETSGRSAFRR

S.e. IscS 51 VDLARNQIAELVGDPREIVFTSGATESDNLAIKGAANFYQKKGKHE--I
E.c. IscS 51 VDLARNQIADLVGADPREIVFTSGATESDNLAIKGAANFYQKKGKHE--I
A.v. IscS 51 VENERRQVAELVNADPREIVVWTSGATESDNLAIKGVAFHFYASKGKHE--I
S.a. IscS 46 IDEERRQIAQLLGADTHEIIFTSGATESNNTAIKGIKVKANEQLGNH--I
B.s. YrvO 47 VDEARAQIAAEIGAAEQEIIIFTSGGTEADNLAIMGTALARKDLGRH--I
M.t. IscS 44 IESARELIADKLGARPESEVIFTAGGTESDNLAVKGIYWARDAEPERRRI

S.e. IscS 98 ITSKTEHKAVLDTC-RQLEREGFEVTYLAPQRNGIIDLNELEAAMR--DD
E.c. IscS 98 ITSKTEHKAVLDTC-RQLEREGFEVTYLAPQRNGIIDLKELEAAMR--DD
A.v. IscS 98 ITSKIEHKAVLDTT-RQLEREGFEVTYLEPGEDGLITPAMVAALR--ED
S.a. IscS 93 ITSKIEHHSVLFHVF-EQLEREGFDVTYLDVDDTGAIDLDOLEETIT--DK
B.s. YrvO 94 ITTKIEHHAVLHTC-EKLEGDFDITYLDVDQNGRVSAKQVKEALR--DD
M.t. IscS 94 VTTEVEHHAVLDSVNWLVEHEGAHVTLWLPAAADGSVSATAALREALQSHDD

S.e. IscS 145 TILVSI MHVNNEIGVVQDIATIGEMCRARGIYHVDAATQSVGKLPIDLSQ
E.c. IscS 145 TILVSI MHVNNEIGVVQDIAAIGEMCRARGIYHVDAATQSVGKLPIDLSQ
A.v. IscS 145 TILVSI MHVNNEIGTVNDIAAIGELTRSRGVLYHVDAATQSGVVAIDLER
S.a. IscS 140 TILVSI MFVNNEVGTVOQIYDIQDIIAETNAYFHVDAVQAIGHLDVKFDE
B.s. YrvO 141 TILVTVMYGNNEVGTVOPIEEIGELLKHKAYFHTDAVQAFGLLPIDLVKN
M.t. IscS 144 VALVSI MVWANNEVGTITLPIAEMSVMAMEFGVPMHSDAIQAVGOLPPLDFGA

S.e. IscS 195 LKVDLMSFSGHKIYGPKGIGALYVFRKPRVRIEAQMHGGGHERGMRSGTL
E.c. IscS 195 LKVDLMSFSGHKIYGPKGIGALYVFRKPRVRIEAQMHGGGHERGMRSGTL
A.v. IscS 195 MKVDLMSFSAHKTYGPKGIGALYVFRKPRVRIEAQMHGGGHERGMRSGTL
S.a. IscS 190 FEIDAMSI TAHKFGGPKGVGALLVVDH--VTLDYPQLGGEQELKRRAGTE
B.s. YrvO 191 SHIDL LSVSGHKLNGPKGTGFLYASKD--VKLSPLLFEGGEQELKRRAGTE
M.t. IscS 194 SGLSAMSVAHGKFGGPPGVGALLLFRD--VTCVPLMHGGGQELRDRSGTP

S.e. IscS 245 PVHQIVGMGEAYRIAKEEMETEMARLRGLRNRLWNGIKDIEEYV-LNGDL
E.c. IscS 245 PVHQIVGMGEAYRIAKEEMATEMERLRGLRNRLWNGIKDIEEYV-LNGDL
A.v. IscS 245 ATHQIVGMGEAFRIAREEMAAESRRIAGLSHRFHEQVSTLEEYV-LNGSA
S.a. IscS 238 NLAQIVGMAKALQLAEKNRDDNNIHLMLNLEKQFLVKLQERAIPEELNGSM
B.s. YrvO 239 NVPGIVGLKEAIKLSSEERDEKNEKYQSFKAIFADTLRDAGVAFEVNGDK
M.t. IscS 242 DVASAVGMATAAQIAVDGLEENSARLRLRLRDLVEGVLAIEDDVCNLGAD

S.e. IscS 294 E-QGAPNINLVSFNYVEGESLIMALK--DLAVSSGSACTASALEPSYVIR
E.c. IscS 294 E-HGAPNINLVSFNYVEGESLIMALK--DLAVSSGSACTASALEPSYVIR
A.v. IscS 294 T-ARVPHNINLVSFNYVEGESLIMSLR--DLAVSSGSACTASALEPSYVIR
S.a. IscS 288 T-DATGHI VNLVYFPFVEVEMMLTLLDMAQIYVSSGSACTAGSTQPSHEVID
B.s. YrvO 289 E-HSLPHVNLVYFPFVGSVEALLVNLDMAGVAVSSGSACTAGSVLPSEVIT
M.t. IscS 292 DPMRLAGNAHFTFRGCEGDALLMLLDANGIECSTGSACTAGVAQPSHEVIT

S.e. IscS 341 ALGMDN-ELAHSSIRFSLGRFTTEEEIDYTI DLVRSIGRLRDLSPWEM
E.c. IscS 341 ALGLND-ELAHSSIRFSLGRFTTEEEIDYTI ELVRSIGRLRDLSPWEM
A.v. IscS 341 ALGRND-ELAHSSIRFTFGRFTTEEEVDYAARKVCEAVGKRLRELSPLWDM
S.a. IscS 337 AMFEDE-ERSNHSIRFSFNELTTENEINAIVAEIHKIYKFKKEE-----
B.s. YrvO 338 AMFGEESDRLTSSIRISFGLGNTAEQVKTA AKHVADVVKRLT-----
M.t. IscS 342 AMGVDA-ASARGSLRRLSLGHTSVVEADVDAALEVLPGAVARARRAALAAAG

```

27

28 **Figure S3:** Amino acid sequence alignment of IscS sequences from Gram-negative  
29 *Salmonella enterica* (S.e.), *Escherichia coli* (E.c.), *Azotobacter vinelandii* (A.v.)  
30 containing the *iscS* within the ISC operon. The alignment also includes Gram-positive  
31 *Staphylococcus aureus* (S.a.), *Bacillus subtilis* (B.s.) and *Mycobacterium tuberculosis*  
32 (M.t.) cysteine desulfurase sequences whose coding sequence is located immediately  
33 upstream of *mnmA*. Multiple alignment of sequences was accomplished with ClustaW.  
34 Conserved and identical residues are colored in dark gray, while similar residues are  
35 shaded in light gray. The residues boxed in red with asterisks are those which are  
36 necessary for TusA binding and/or s<sup>2</sup>U synthesis and are not conserved within *B.*  
37 *subtilis* YrvO.

38



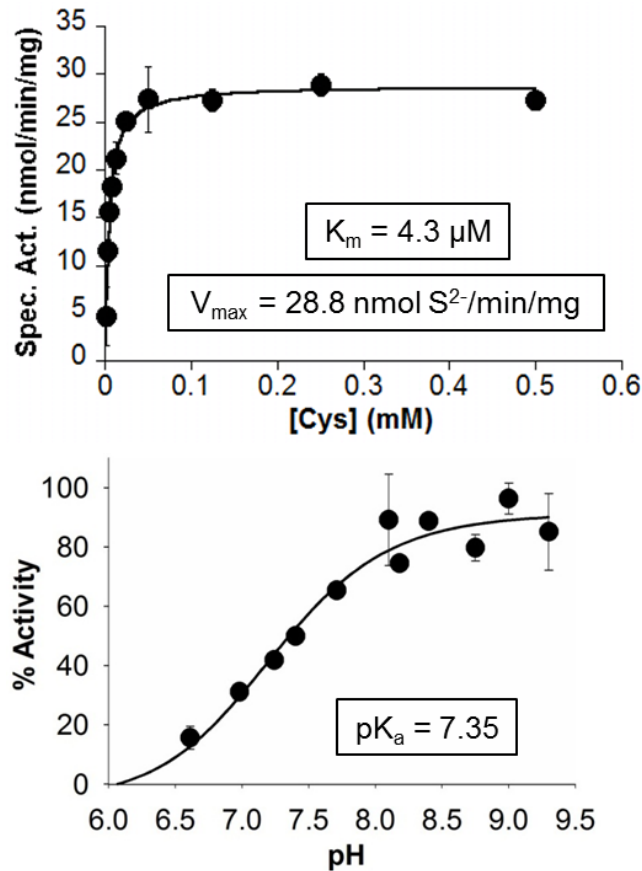

39  
 40 **Figure S4:** Activity profile of cysteine desulfurase, YrvO. **A.** Substrate saturation curve  
 41 of YrvO activity was quantified by release of  $S^{2-}$ . Assays containing a fixed concentration  
 42 of YrvO (0.05 mg) and various cysteine concentrations were performed in the presence  
 43 of 2 mM DTT. Kinetic constants  $K_m = 4.3 \pm 0.4 \mu\text{M}$  and  $V_{\text{max}} = 28.8 \pm 0.5 \text{ nmol } S^{2-}$   
 44 /min/mg were determined using the Michaelis-Menten equation. **B.** The pH profile of  
 45 YrvO displays dependence of YrvO cysteine desulfurase activity on pH. Assays  
 46 measuring release of  $S^{2-}$  were conducted with constant concentrations of YrvO (0.05  
 47 mg), L-cysteine (0.5 mM) and DTT (2mM), and a  $pK_a$  of 7.35 was calculated using the  
 48 Henderson-Hasselbalch equation. When not visible, error bars are smaller than the  
 49 symbols.  
 50

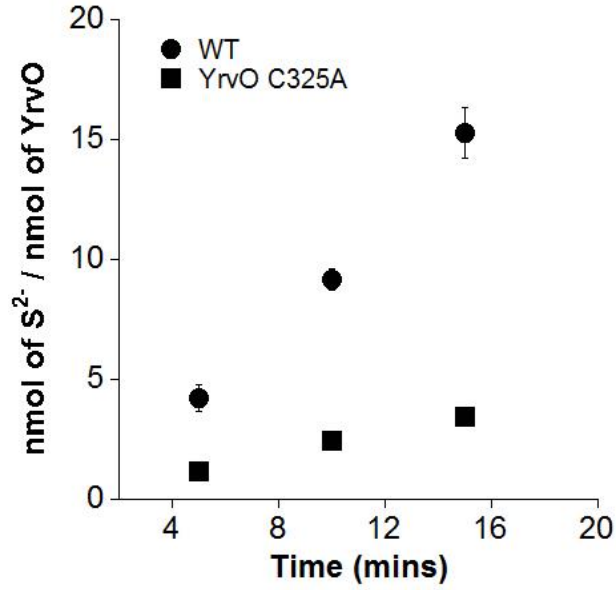

51

52 **Figure S5:** Activity comparison between YrvO WT and C325A mutant. YrvO WT (0.025  
53 mg) or C325A (0.05 mg) were incubated with 0.5 mM L-cysteine and 2 mM DTT, and  
54 the activity of each enzyme was quantified by the production of sulfide as mentioned in  
55 the materials and methods. When not visible, error bars are smaller than the symbols.

56

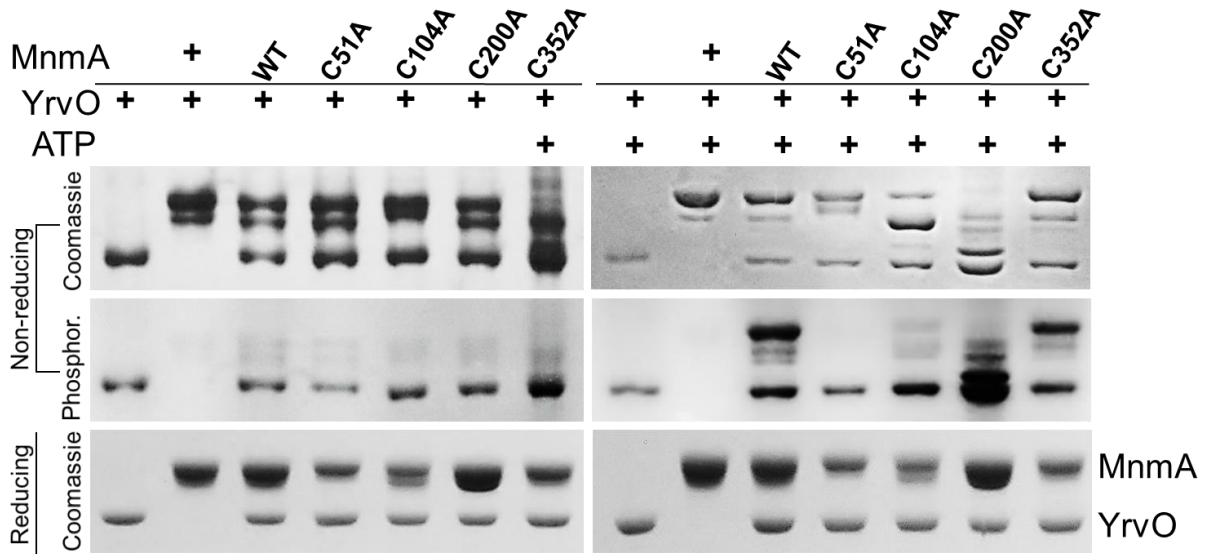

58

59

60 **Figure S6:** Sulfur transfer from YrvO to MnmA *in vitro*. YrvO (9  $\mu$ g) and/or MnmA wild  
61 type or individual Cys to Ala variants (18  $\mu$ g) were incubated with  $^{35}$ S-L-cysteine (10  $\mu$ Ci),  
62 L-cysteine (200  $\mu$ M), and  $MgCl_2$  (5 mM), in the absence (left), or presence (right) of ATP  
63 (1 mM). Reactions were quenched with N-ethylmaleimide (0.4 mM) and subjected to  
64 SDS-PAGE analysis. The top panel displays the Coomassie stained gel and the middle  
65 panel shows the occurrence of radiolabeling, as imaged using a phosphorimager, both of  
66 which were conducted under non-reducing conditions. The bottom panel demonstrates  
67 that under reducing conditions, MnmA migrates in a single conformation, establishing that  
68 the multiple bands seen in non-reducing gels are all different conformations of the same  
69 protein. The phosphorimage associated with the bottom reducing gel showed complete  
70 bleaching, indicating reduction of the covalently modified radiolabel (data not shown).

71

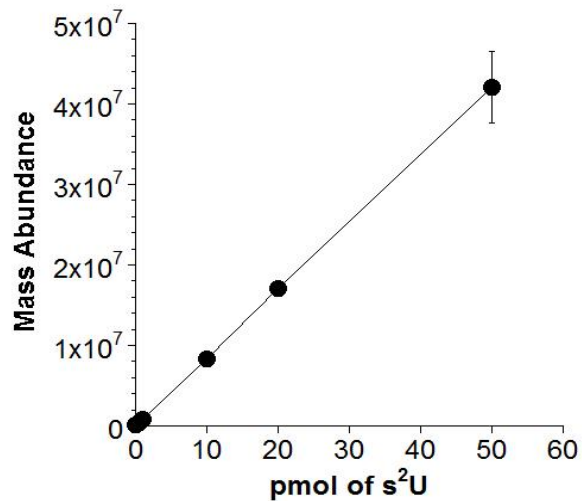

72

73 **Figure S7:** Standard curve generated for determination of pmol of s<sup>2</sup>U formed during *in*  
74 *vitro* assays. 2-thiouridine was suspended in Optima water and methanol and formic  
75 acid were added to the sample to final concentrations of 2% and 0.1% respectively.  
76 Next, 10  $\mu$ L injection volumes containing 0, 0.5, 1, 10, 20 or 50 pmol of s<sup>2</sup>U were  
77 subjected to the same LCMS conditions used for *in vitro* samples. Standard deviations  
78 were obtained from at least three independent experiments, and where not visible, error  
79 bars are smaller than the symbols.

80
